# Supplementary material for: Establishment of a prognostic signature and immune infiltration characteristics for uterine corpus endometrial carcinoma based on a disulfidptosis/ferroptosis-associated signature
Source: Front Immunol. 2025 Jan 27;16:1492541. doi: 10.3389/fimmu.2025.1492541 (PMC11808162; doi:10.3389/fimmu.2025.1492541)
Supplement: Supplementary file 2 [file Table1.xlsx]

## Sheet: 10例
ID	name	age	Discharge time	Admission time	Telephone	work	Education level	height	weight	smoke(NO=0,YES=1)	drink(NO=0,YES=1)	menopause	Gravidity	Parity	Past history	clinical stage	supplementary information
********	***	59	2023-08-26 14:52:51	2023-08-13 12:04:00	********	clerk	primary school	156	64.7	0	0	1	2	2	hypertension	IB	Vegetable shaped tumor, size 5cm
********	***	63	2023-08-24 09:12:55	2023-08-10 16:02:00	********	liberal professions	primary school		54.3	0	0	1	2	2	diabetes	IB	The surface of the endometrium is rough, with a muscle wall thickness of 1.4-1.6cm
********	***	66	2023-05-31 10:14:14	2023-05-16 10:58:00	********	clerk	middle school	158	57	0	0	1	3	3		IB	The endometrium is slightly rough, with a muscle wall thickness of 2.1cm
********	***	63	2023-05-24 15:08:40	2023-05-09 10:54:00	********	liberal professions	primary school	162.5	64	0	0	1	2	2		IB	Vegetable shaped tumor, size 3 * 1.5cm
********	***	62	2023-02-12 10:09:36	2023-01-31 10:13:00	********	liberal professions	primary school	156	60.5	0	0	1	2	2	diabetes	IB	A rough area was observed at the bottom of the palace, with a range of 2.4 × 1 × 0.6cm
