# Supplementary material for: Establishment of a prognostic signature and immune infiltration characteristics for uterine corpus endometrial carcinoma based on a disulfidptosis/ferroptosis-associated signature
Source: Front Immunol. 2025 Jan 27;16:1492541. doi: 10.3389/fimmu.2025.1492541 (PMC11808162; doi:10.3389/fimmu.2025.1492541)
Supplement: Supplementary file 3 [file Table2.xlsx]

## Sheet: Sheet1
Primer name	Sequence（5‘-3’）
CDKN2A-F	TTATTAGAGGGTGGGGTGGATTGT
CDKN2A-R	CAACCCCAAACCACAACCATAA
MYH10-F	TGCCAACTCCACCATAAC
MYH10-R	TCTACAACCCTGCCACTC
LCN2-F	GGGACAGGGAAGACGATG
LCN2-R	GCACCAACTACAACCAGC
FZD7-F	TGCTGCTGTGGCTAAGTCTGT
FZD7-R	TTCGTGTCCCTCTTCCGTATC
ACTN4-F	GCTTCCCTGCGACTATGTG
ACTN4-R	GAGGAGTGGCTGCTGAATG
