# Supplementary material for: Establishment of a prognostic signature and immune infiltration characteristics for uterine corpus endometrial carcinoma based on a disulfidptosis/ferroptosis-associated signature
Source: Front Immunol. 2025 Jan 27;16:1492541. doi: 10.3389/fimmu.2025.1492541 (PMC11808162; doi:10.3389/fimmu.2025.1492541)
Supplement: Supplementary file 4 [file Table3.xlsx]

## Sheet: P_value_dm
SLC7A11	ACTN4	MYH9	MYH10	IQGAP1	FLNA	FLNB	TLN1	DSTN
ZEB1	2.17444e-09	8.05338e-15	9.01319e-31	7.53395e-29	2.72446e-40	3.12717e-36	1.27384e-13	5.15446e-42	7.06681e-41
CDKN2A	0.429124	2.65745e-08	0.552858	0.0259348	0.757483	0.115955	0.0158103	0.0473873	0.0847984
CDO1	0.719189	0.000265305	1.55575e-07	1.50806e-10	8.47787e-10	2.55751e-13	0.0037116	5.50003e-14	5.01737e-19
ANO6	7.20624e-16	4.34538e-51	1.18793e-65	3.78585e-84	2.32751e-154	8.33957e-59	2.1792e-57	9.69108e-86	1.17689e-86
ATF3	0.000322419	2.46984e-16	1.30739e-18	2.56154e-19	1.56708e-37	4.83725e-14	1.77741e-13	2.93561e-17	4.40879e-32
MIOX	0.0674445	0.00459858	0.255193	0.32515	0.609548	0.926822	0.049666	0.173143	0.740005
GRIA3	0.0201626	1.28919e-13	1.65126e-17	7.97575e-25	1.46669e-20	3.42018e-28	1.55804e-09	4.56857e-24	3.62505e-25
CDCA3	1.77645e-08	7.62603e-08	2.90416e-06	2.4472e-11	1.77987e-05	0.000600735	0.0156519	1.28621e-05	2.93749e-09
SNCA	0.0963302	8.56e-27	3.6012e-27	1.74561e-28	5.28292e-23	1.57091e-47	1.46561e-09	1.0717e-43	2.5176e-26
PRKCA	5.38787e-14	3.81365e-18	2.90054e-24	4.12513e-25	8.39733e-41	1.5505e-19	2.46048e-13	9.64507e-34	8.48822e-31
MYCN	0.102183	0.312944	0.619057	0.552953	0.864609	0.0359368	0.34446	0.196311	0.735148
KLF2	0.136886	1.11939e-09	3.19255e-15	0.0018941	5.03281e-08	1.66858e-15	1.6818e-08	2.1847e-19	1.87503e-17
DDR2	7.50308e-06	2.36308e-29	3.8406e-43	2.87346e-50	1.04649e-47	6.87232e-62	2.34926e-25	1.04104e-60	1.16017e-45
LIFR	0.0172446	4.00793e-16	1.03861e-20	1.91861e-43	1.96667e-52	8.9972e-23	1.54919e-25	1.86626e-36	5.72916e-44
CPEB1	0.000276324	4.18422e-06	0.000572989	3.37859e-12	5.50751e-06	5.71477e-17	2.99658e-05	1.13303e-11	3.82879e-15
MUC1	0.00165217	3.7029e-06	0.0230176	0.191347	0.120805	0.0573357	1.60547e-06	0.309973	0.139512
MT1G	0.000186748	0.00563013	0.00905251	0.266926	0.723842	0.0409049	0.207144	0.119328	0.0816506
SCD	1.48636e-26	6.70091e-08	1.65339e-13	3.99521e-11	4.41715e-24	0.00755465	9.44902e-10	8.23658e-08	2.83382e-15
CA9	0.0127324	0.189479	0.623236	0.0724982	0.87701	0.0166031	0.487821	0.672628	0.357472
ZFP36	0.0470186	8.45298e-21	1.95944e-18	7.33789e-08	8.66973e-25	1.75642e-10	2.79155e-12	6.19691e-18	9.4681e-19
PROM2	2.47488e-09	3.13532e-13	1.55715e-08	0.0172548	6.14789e-07	0.284758	2.57745e-13	8.66451e-06	0.00013095
CAV1	4.44393e-06	1.86383e-29	2.69494e-37	3.64994e-31	5.74518e-51	1.76565e-39	1.77833e-21	6.30107e-42	5.75416e-60
RRM2	1.55292e-21	6.82753e-16	2.5377e-16	7.59329e-20	1.19794e-21	5.01003e-06	4.42685e-08	3.53416e-10	5.43682e-16
NR4A1	0.0183899	6.70789e-22	1.59933e-28	2.90661e-15	2.24019e-28	2.02567e-19	3.62708e-15	4.38602e-24	3.23161e-20
FZD7	6.22881e-07	5.50572e-30	2.64966e-31	9.05535e-49	2.81118e-30	1.19233e-54	1.76176e-16	1.32908e-42	4.45642e-25
FNDC5	0.47752	1.74582e-19	2.1424e-21	8.22918e-38	1.01226e-17	1.76884e-41	8.55517e-17	6.03134e-37	1.04952e-22
CDH1	2.6622e-26	4.00984e-24	2.3919e-24	3.21393e-24	6.34269e-41	0.000480962	3.52725e-34	6.69178e-13	2.69914e-31
TFAP2A	3.50054e-10	7.9102e-05	0.00532098	0.00940666	5.14226e-05	0.453194	0.00165928	0.0974566	0.00159316
CP	0.000521773	2.20125e-10	4.10788e-09	5.04405e-06	5.57665e-11	0.032444	7.15522e-13	2.02159e-05	0.000547544
GDF15	8.45337e-08	0.00549604	0.00941223	0.225513	0.0552578	0.0986169	0.0177627	0.616253	0.0354462
NEDD4	1.95276e-11	2.18574e-19	2.43468e-39	2.18483e-43	6.93791e-71	6.80688e-25	1.99547e-25	3.66342e-42	7.96586e-56
AR	0.475908	0.000177394	1.07374e-07	1.21864e-10	2.14298e-12	3.74502e-06	8.08612e-11	4.57094e-10	1.90668e-17
BEX1	0.0250644	5.71009e-05	0.000716161	4.86262e-17	0.00229529	4.25523e-17	0.435991	8.68941e-08	1.98466e-06
KIF20A	2.55879e-11	1.46559e-16	2.35077e-14	4.8209e-24	1.5011e-14	2.17212e-07	8.7224e-07	4.73337e-15	2.82022e-08
MEF2C	6.26763e-07	7.55926e-15	2.68128e-27	3.08647e-21	2.81055e-46	1.04497e-24	6.44402e-14	9.89856e-42	6.07061e-55
EZH2	3.09492e-17	4.87955e-14	1.7678e-13	1.50296e-27	7.80443e-23	1.27939e-08	1.17512e-09	2.9647e-12	2.43487e-21
CDC25A	1.93834e-13	2.18458e-12	8.27515e-11	1.81934e-28	3.16842e-15	3.65703e-10	1.91927e-08	1.1513e-10	3.10138e-14
LCN2	9.80514e-05	0.157743	0.882759	3.79261e-08	0.636959	6.88548e-06	0.421319	0.191652	0.623667
PDK4	5.30766e-07	1.00714e-17	2.63017e-23	9.76835e-30	2.31338e-64	2.98761e-15	1.92122e-25	1.12238e-31	2.0963e-61
RARRES2	0.585254	1.14157e-09	4.52574e-13	3.1233e-07	0.00253659	3.3524e-20	0.0391454	8.38698e-16	7.6367e-14

## Sheet: R_value_dm
SLC7A11	ACTN4	MYH9	MYH10	IQGAP1	FLNA	FLNB	TLN1	DSTN
ZEB1	0.243375	0.312631	0.450445	0.436889	0.509857	0.485929	0.298906	0.519466	0.51316
CDKN2A	-0.0326405	0.226695	0.0245024	0.0917709	-0.0127499	0.0648419	0.0994016	0.0817377	0.0710767
CDO1	0.0148454	0.149743	0.214095	0.259899	0.249343	0.295323	0.119388	0.303158	0.355874
ANO6	0.32407	0.565529	0.626936	0.689104	0.834911	0.599711	0.59373	0.693808	0.696473
ATF3	0.147695	0.328993	0.351887	0.35864	0.4938	0.303802	0.297199	0.338527	0.45935
MIOX	0.0754032	0.116617	0.0469573	0.0406117	-0.0210863	-0.0037924	0.0809162	0.0562025	-0.013702
GRIA3	0.0957137	0.298844	0.341047	0.406348	0.370111	0.432112	0.245505	0.400227	0.409072
CDCA3	0.229466	0.219269	0.191355	0.270529	0.175796	0.140976	0.0995519	0.178682	0.241436
SNCA	0.0685841	0.421683	0.424523	0.434245	0.391421	0.548308	0.245894	0.52856	0.418105
PRKCA	0.303261	0.347363	0.401832	0.408627	0.51274	0.360687	0.295523	0.470265	0.450624
MYCN	0.0674093	-0.0416482	-0.0205277	0.0244966	0.00704061	-0.0864536	0.0390221	-0.0533168	0.0139678
KLF2	-0.0613635	0.247599	0.317074	0.127742	0.222227	0.320147	0.22984	0.35929	0.340492
DDR2	0.183372	0.4405	0.525593	0.561646	0.549186	0.612304	0.41056	0.60755	0.538847
LIFR	0.0980976	0.326779	0.371465	0.52721	0.571781	0.389471	0.411981	0.487301	0.530005
CPEB1	-0.149317	0.188324	0.141497	0.281597	0.18601	0.335581	0.17107	0.274893	0.316207
MUC1	0.12938	0.189343	0.0936562	-0.0539131	0.0639949	-0.0783647	0.196176	0.0419045	0.0609568
MT1G	0.153366	0.113948	0.107463	0.0458171	0.0145889	0.084271	0.0520528	0.0642499	0.0718043
SCD	0.419858	0.220194	0.297571	0.26771	0.400346	0.109971	0.248664	0.218716	0.317641
CA9	0.102594	0.0541403	0.0202834	-0.0740576	-0.00639032	-0.0986686	0.0286417	0.0174463	0.0379829
ZFP36	0.0818737	0.37227	0.350186	0.219545	0.406058	0.258986	0.282638	0.345286	0.353237
PROM2	0.242543	0.294266	0.230364	0.0980886	0.20374	0.0441482	0.295283	0.182131	0.156948
CAV1	0.187819	0.441234	0.492389	0.45314	0.564958	0.505223	0.378288	0.518987	0.604518
RRM2	0.378806	0.324321	0.32887	0.363573	0.379794	0.18681	0.223132	0.254752	0.325374
NR4A1	0.0971228	0.38199	0.434522	0.317521	0.433456	0.359599	0.316466	0.400371	0.366989
FZD7	0.203638	0.444976	0.454089	0.55442	0.447019	0.581809	0.330528	0.52268	0.408361
FNDC5	-0.0293233	0.360204	0.377576	0.495467	0.343172	0.516513	0.333781	0.490281	0.388904
CDH1	0.417919	0.400689	0.402511	0.40147	0.513423	0.14341	0.473074	0.290295	0.454034
TFAP2A	0.254811	0.161907	0.114698	0.106924	0.166032	0.0309657	0.129329	0.0683536	0.129813
CP	0.142523	0.257627	0.239253	0.186753	0.265773	0.0881473	0.289941	0.174652	0.141996
GDF15	0.218529	0.114268	0.106916	-0.0500145	0.0790265	-0.0681185	0.0976498	-0.020692	0.0866828
NEDD4	0.271816	0.359288	0.504419	0.526908	0.646069	0.406897	0.411118	0.520279	0.586986
AR	0.0294307	0.153889	0.216802	0.26117	0.284073	0.189249	0.263596	0.253175	0.340419
BEX1	0.0923133	0.165038	0.139025	0.336298	0.125406	0.336889	0.0321573	0.218331	0.194465
KIF20A	0.270274	0.33136	0.307391	0.400036	0.309598	0.211627	0.201017	0.315192	0.226283
MEF2C	0.20359	0.312937	0.425484	0.376174	0.541998	0.405409	0.302361	0.517907	0.583109
EZH2	0.338294	0.303758	0.297227	0.427362	0.389993	0.231698	0.247292	0.28231	0.377085
CDC25A	0.296754	0.283969	0.26346	0.434114	0.31711	0.254543	0.228936	0.261507	0.306019
LCN2	0.159812	0.0582837	0.00608939	-0.224218	-0.0194861	-0.184109	0.0331952	-0.0538762	-0.0202582
PDK4	0.204873	0.343194	0.393957	0.443222	0.622008	0.31739	0.411248	0.45662	0.610363
RARRES2	-0.0225313	0.247475	0.292351	0.208909	0.124175	0.366843	0.0850169	0.323365	0.301504
